# Supplementary material for: Discovery and preclinical evaluation of anti-miR-17 oligonucleotide RGLS4326 for the treatment of polycystic kidney disease
Source: Nat Commun. 2019 Sep 12;10:4148. doi: 10.1038/s41467-019-11918-y (PMC6742637; doi:10.1038/s41467-019-11918-y)
Supplement: Supplementary file 1 — Supplementary Information [file 41467_2019_11918_MOESM1_ESM.pdf]

## **SUPPLEMENTARY INFORMATION:**

### **Discovery and preclinical evaluation of anti-miR-17 oligonucleotide RGLS4326 for the treatment of polycystic kidney disease**

#### **AUTHORS:**

Edmund C. Lee<sup>1,\*</sup>, Tania Valencia<sup>1</sup>, Charles Allerson<sup>1</sup>, Annelie Schairer<sup>1</sup>, Andrea Flaten<sup>2</sup>, Matanel Yheskel<sup>2</sup>, Kara Kersjes<sup>1</sup>, Jian Li<sup>1</sup>, Sole Gatto<sup>1</sup>, Mandeep Takhar<sup>1</sup>, Steven Lockton<sup>1</sup>, Adam Pavlicek<sup>1</sup>, Michael Kim<sup>1</sup>, Tiffany Chu<sup>1</sup>, Randy Soriano<sup>1</sup>, Scott Davis<sup>1</sup>, John R. Androsavich<sup>1</sup>, Salma Sarwary<sup>1</sup>, Tate Owen<sup>1</sup>, Julia Kaplan<sup>1</sup>, Kai Liu<sup>1</sup>, Graham Jang<sup>1</sup>, Steven Neben<sup>1</sup>, Philip Bentley<sup>1</sup>, Timothy Wright<sup>1</sup>, Vishal Patel<sup>2,\*</sup>

#### **AFFILIATIONS:**

<sup>1</sup>Regulus Therapeutics Inc., San Diego, California.

<sup>2</sup>Department of Internal Medicine and Division of Nephrology, University of Texas Southwestern Medical Center, Dallas, Texas.

#### **\*TO WHOM CORRESPONDENCE SHOULD BE ADDRESSED:**

Email: [elee@regulusrx.com](mailto:elee@regulusrx.com) (E.C.L); [vishald.patel@utsouthwestern.edu](mailto:vishald.patel@utsouthwestern.edu) (V.P.)

## Supplementary Figure 1

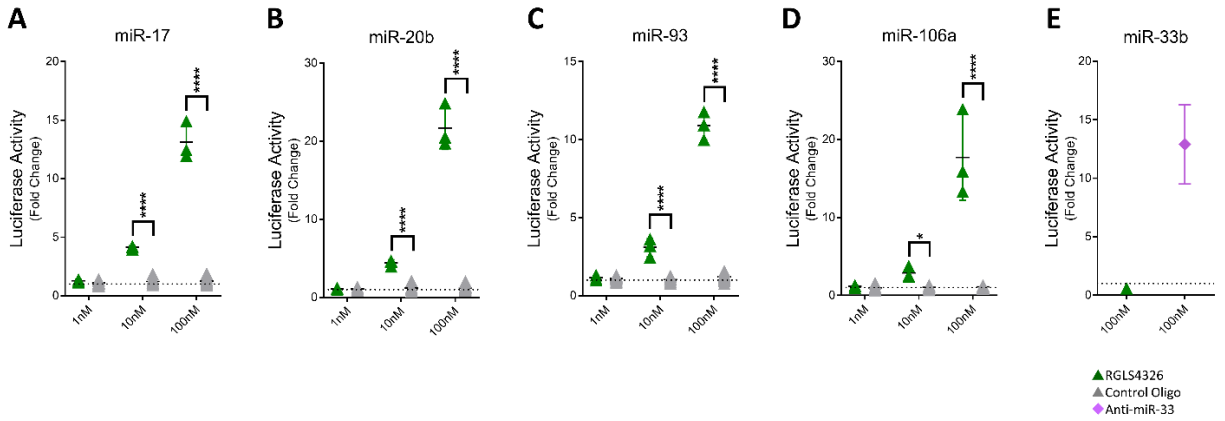

**Supplementary Figure 1. *RGLS4326* inhibits *miR-17* family of *miRs* in luciferase sensor assays.** *RGLS4326* (green triangle) dose-responsively inhibited *miR-17* family members, including (A) *miR-17*, (B) *miR-20b*, (C) *miR-93* and (D) *miR-106a*, in corresponding HeLa cell luciferase sensor assays 24 h following transfection (1-100 nM; n=3/group). Control oligo (grey triangle) containing the same chemical-modification, length, and design as *RGLS4326*, but different base pair sequence, was used as a negative control. (E) *RGLS4326* has no activity against *miR-33b* in corresponding HeLa cell luciferase sensor assay 24 h following transfection at 100  $\mu$ M (mean  $\pm$  standard deviations; n=3). An anti-*miR-33* oligonucleotide (magenta diamond) was used as a positive control. Error bars represent standard deviations. \* $p < 0.05$ , \*\*\*\* $p < 0.0001$ . One-way ANOVA, Dunnett's multiple comparison test.

Supplementary Figure 2

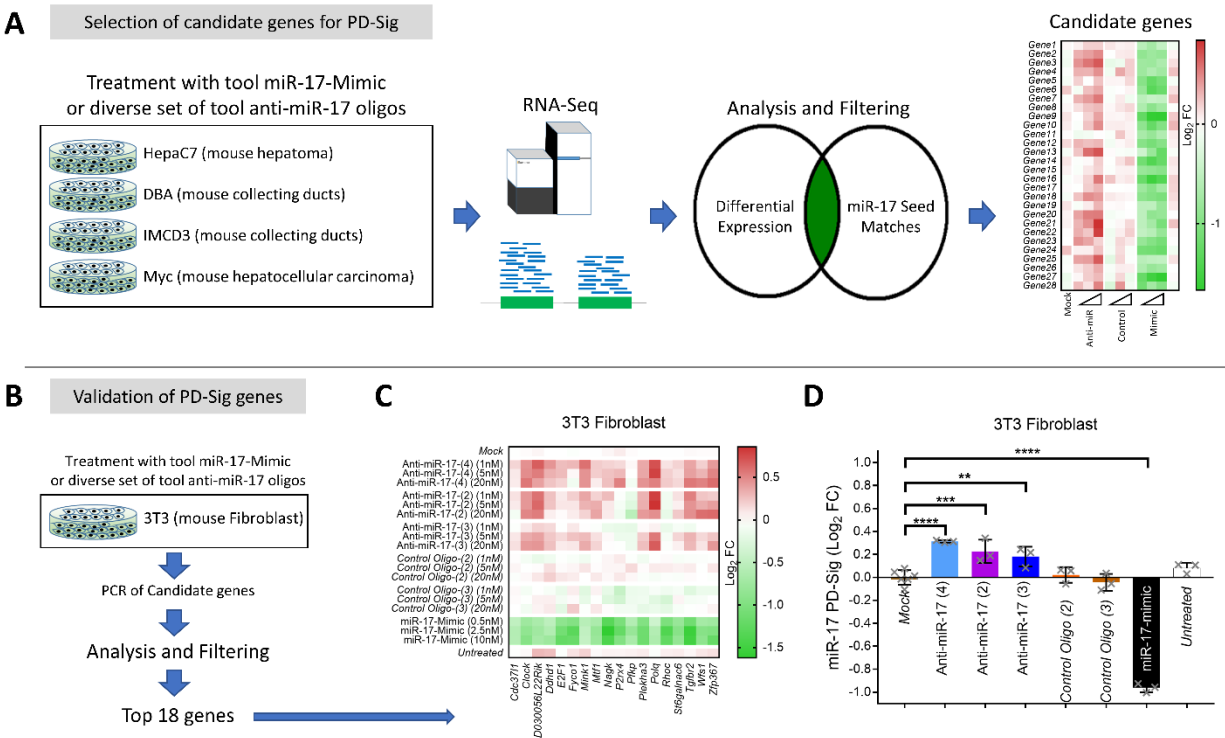

**Supplementary Figure 2. Development of a mouse miR-17 PD-Signature (PD-Sig) for assessing miR-17 activity following anti-miR treatment.** (A) Schematic illustration of the miR-17 PD-Sig candidate genes selection. Four different mouse kidney and non-kidney cell lines were transfected with tool anti-miR-17 oligos, a miR-17-mimic, or PBS for 24 h prior to RNA-seq analysis. Direct miR-17 target genes differentially regulated by treatments were ranked, filtered and selected. (B) Candidate genes were validated by qPCR in 3T3 cells following anti-miRs and mimic treatment. Following additional analysis and filtering, (C) top 18 ranked genes (*Plekha3*, *Rhoc*, *D030056l22rik*, *Clock*, *Polq*, *Mtf1*, *E2f1*, *Tgfb2*, *P2rx4*, *Nagk*, *Mink1*, *Zfp367*, *Fyco1*, *Pfkip*, *Ddhd1*, *Cdc37l1*, *Wfs1*, and *St6galnac6*) were chosen. (D) The resultant miR-17 PD-Sig score is the average of the 18 genes' individual log<sub>2</sub> FC (Fold Change; normalized by 6 housekeeping genes: *Tbp*, *Gusb*, *Rplp0*, *Hprt1*, *B2m*, and *Pak1ip1*) compared to mock control; and can be used to comprehensively and unbiasedly assess miR-17 activity to rank-order potency of anti-miR-17 or miR-17-mimic oligonucleotides following treatment. An example in 3T3 fibroblast cells transfected with mock (n=6), control oligos and anti-miRs at 20 nM and mimic at 10 nM was shown (n=3/treatment group). Shades of red indicate upregulation, while shades of green indicate downregulation of individual genes. \*\*p<0.01, \*\*\*p<0.001, \*\*\*\*p<0.0001. One-way ANOVA, Dunnett's multiple comparison test. Error bars represent standard deviations.

## Supplementary Figure 3

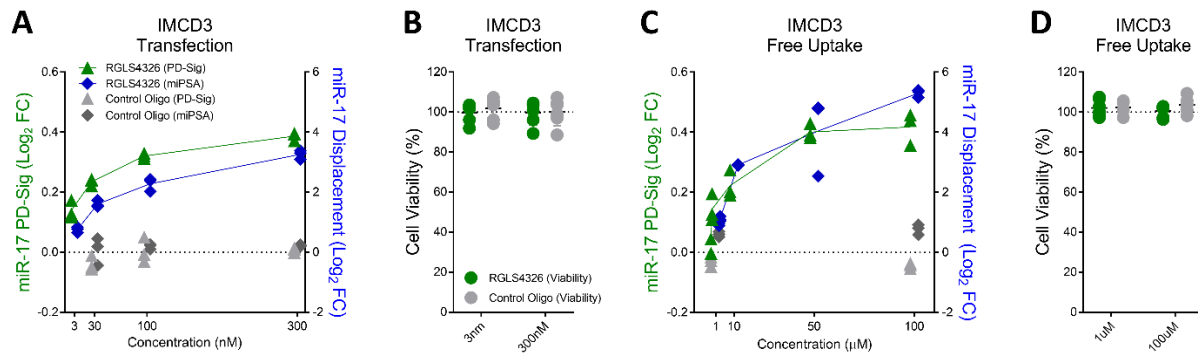

**Supplementary Figure 3. *RGLS4326 inhibits miR-17 activity but has no effect on cell viability in non-ADPKD kidney collecting duct cells.*** Concentration-dependent displacement of miR-17 (blue diamonds, as measured by miRNA polysome shift assay; miPSA; right y-axis) corresponded with concomitant de-repression of miR-17 PD-Sig (green triangles; left y-axis) in IMCD3 cells 24 h following RGLS4326 treatment by either **(A)** transfection or **(C)** free-uptake (n=3/group). **(B and D)** Inhibition of miR-17 following RGLS4326 treatment (green circle) has no effect on cell viability in IMCD3 cells 4 days following either transfection or free-uptake treatment (n=6). Control oligos (grey) was used at corresponding concentrations as negative control. Individual data points were shown.

## Supplementary Figure 4

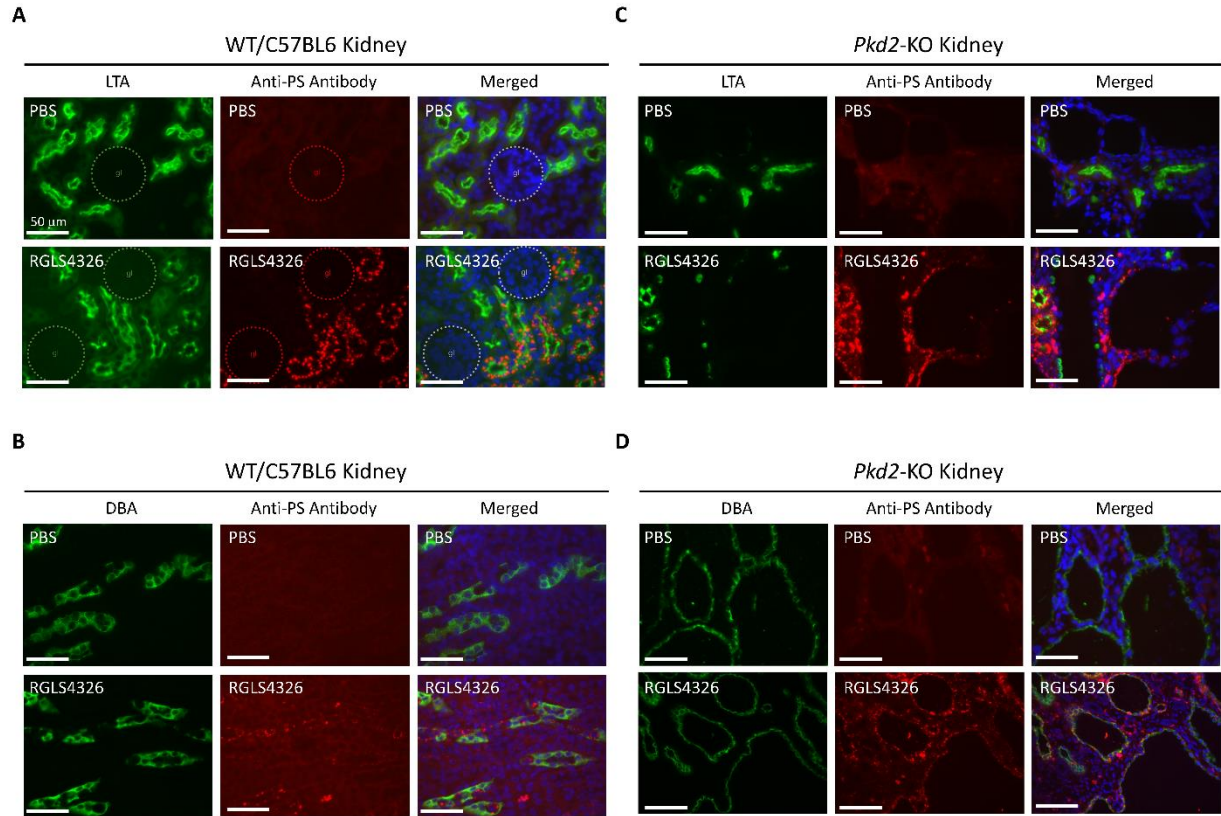

**Supplementary Figure 4. Localization of RGLS4326 in proximal tubules and collecting duct cells following subcutaneous administrations.** (A-B) WT/C57BL6 (n=3) or (C-D) *Pkd2*-KO mice (n=3) were dosed SC with PBS or 20 mg kg<sup>-1</sup> of RGLS4326 on postnatal day (P)21, P22 and P23, and kidneys were harvested on P26. Kidney sections were co-stained with LTA (proximal tubules marker) or DBA (collecting ducts marker), anti-PS antibody (antibody labels RGLS4326) and DAPI. Representative immunofluorescence images of stained kidney sections demonstrating delivery of RGLS4326 to (A and C) proximal tubules and (B and D) collect duct cyst cells are shown. No glomerulus localization of RGLS4326 was observed in all mice tested. Glomerulus, *gl* (dotted circle). Scale bars, 50 μm.

## Supplementary Figure 5

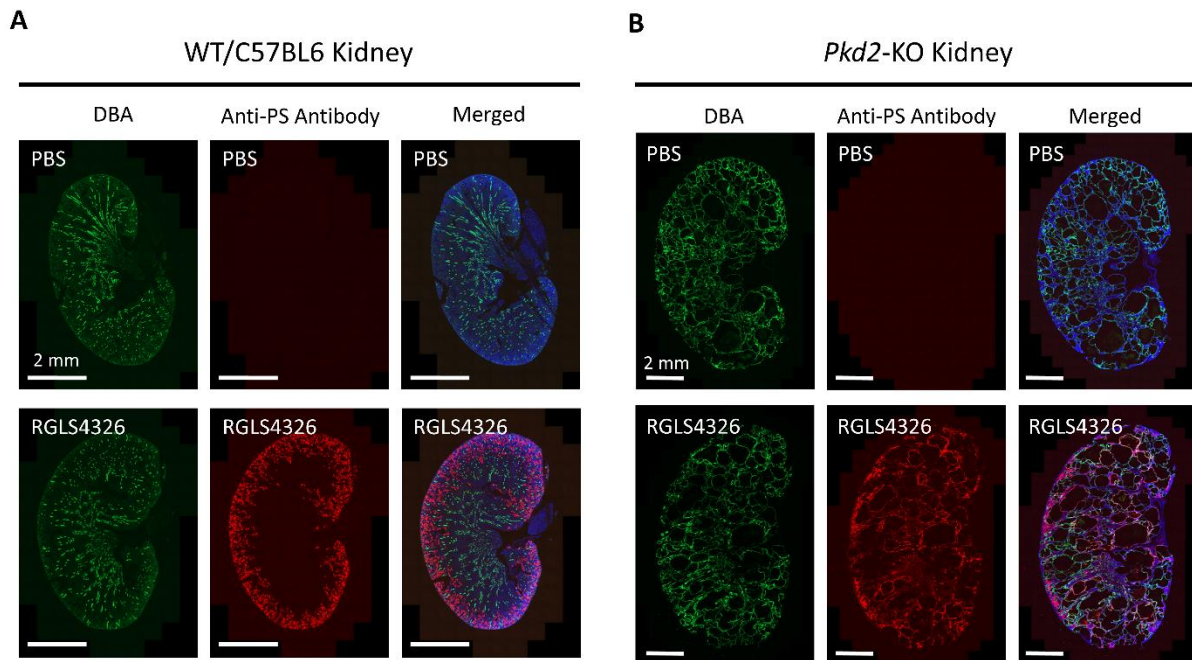

**Supplementary Figure 5. Localization of RGLS4326 in normal and polycystic mouse kidney following subcutaneous administrations.** (A) WT/C57BL6 (n=3) or (B) *Pkd2*-KO mice (n=3) were dosed SC with PBS or 20 mg kg<sup>-1</sup> of RGLS4326 on postnatal day (P)21, P22 and P23, and kidneys were harvested on P26. Kidney sections were co-stained with DBA (collecting ducts marker), anti-PS antibody (antibody labels RGLS4326) and DAPI. Representative immunofluorescence images of stained kidney sections demonstrating delivery of RGLS4326 to cortical collecting ducts in normal mice and numerous collecting duct cysts in ADPKD mice are shown. Scale bars, 2 mm.

## Supplementary Figure 6

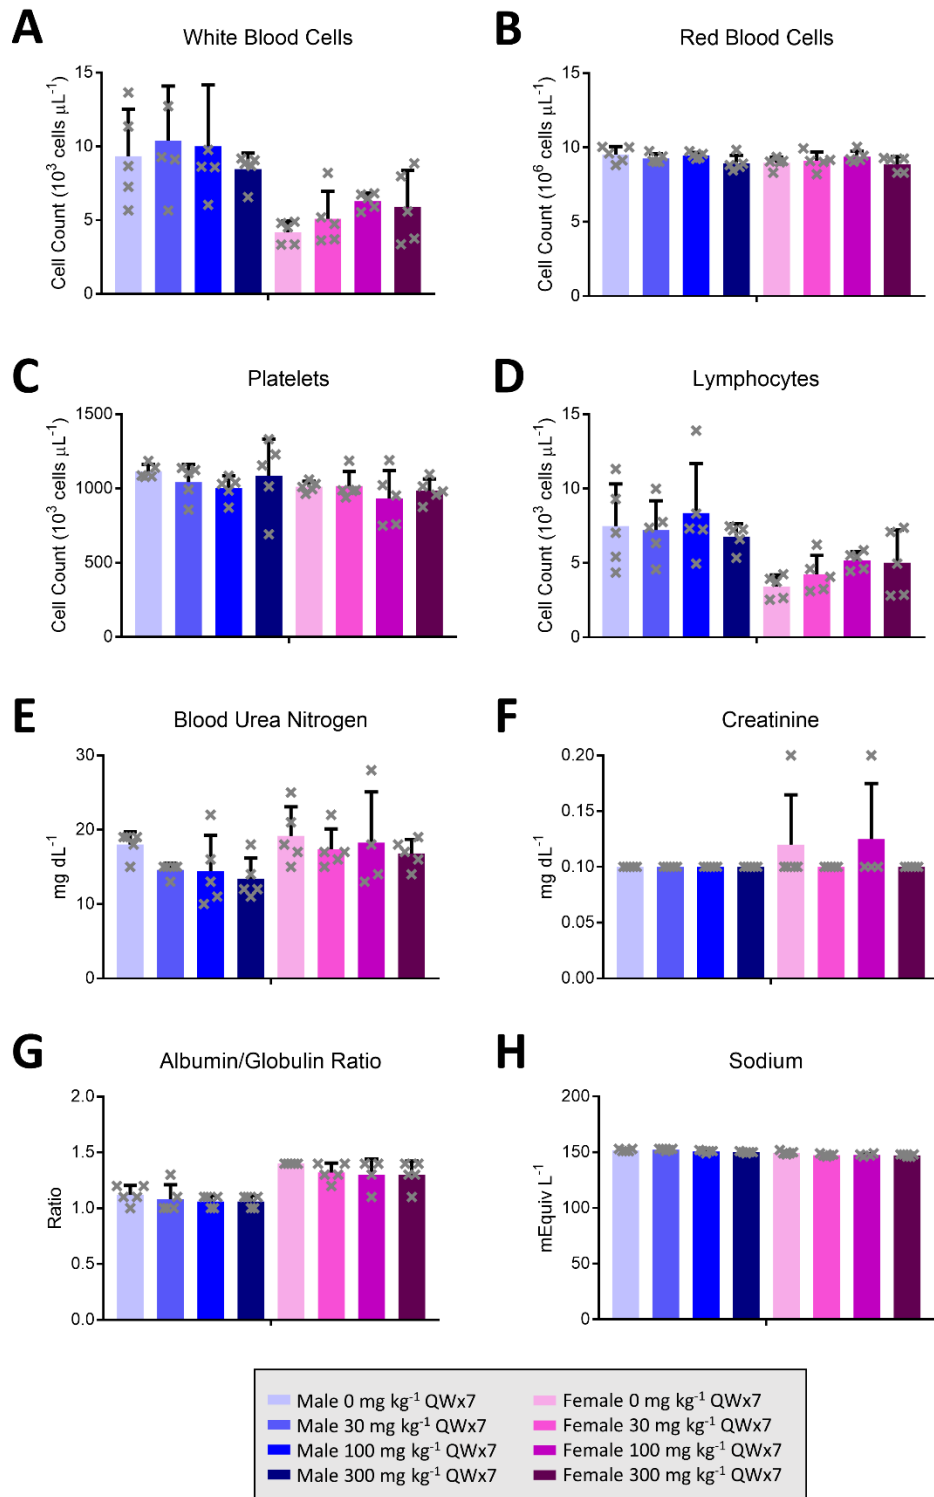

**Supplementary Figure 6. Repeat dosing of RGLS4326 in mice has no effect on hematopoietic cell population and kidney function.** CD1 mice (n=5/sex/group) were dosed SC QW with 0, 30, 100, or 300 mg kg<sup>-1</sup> of RGLS4326 for 7 consecutive weeks (QWx7). Blood was collected for hematology and serum chemistry analysis at 48 h after the last dose. Specimens were analyzed using an Advia 120 automated hematology analyzer and an AU680 chemistry analyzer. Comparison between treatment groups indicated no hematological abnormalities (**A-D**) and no renal toxicity (**E-H**) following RGLS4326 treatment. Error bars represent standard deviations.

## Supplementary Figure 7

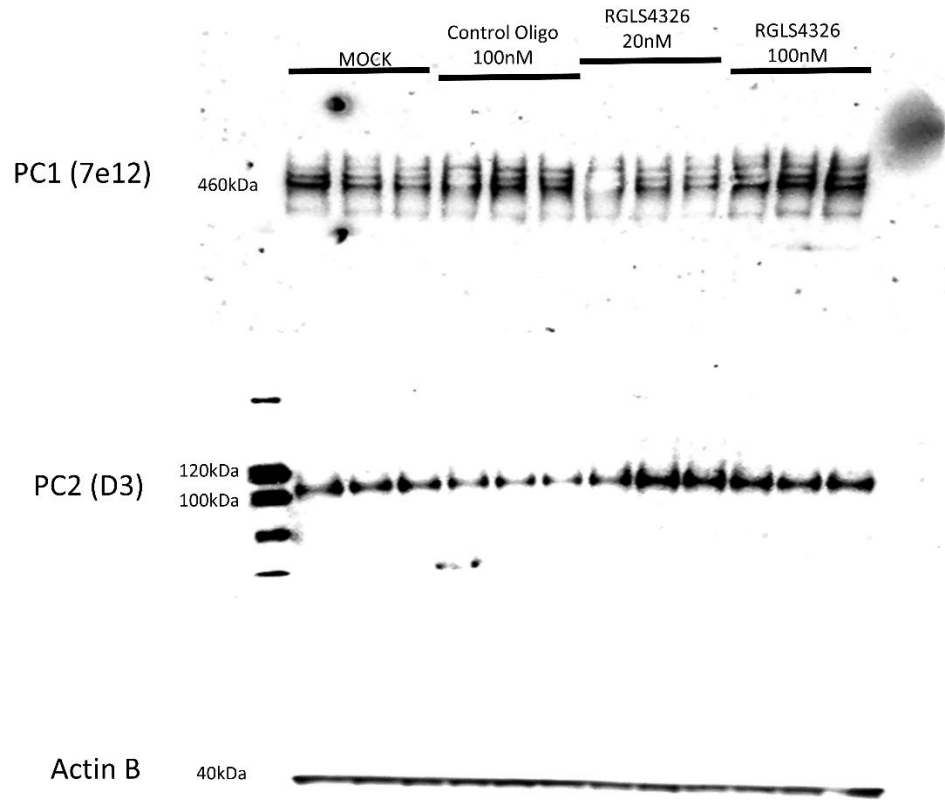

**Supplementary Figure 7.** *The original Western blot demonstrating increased expression of PC1 and PC2 in primary ADPKD human cyst cells following RGLS4326 treatment.* The blot was cut into three different sections (top, middle, bottom) prior to immunoblotting with respective primary antibody (PC1, PC2 and Actin-B, respectively). The blot is shown accompanied with indicated protein name (far left) and molecular weight (left).

**Supplementary Table 1. Metabolic Stability Profile of RGLS4326**

| <b><i>In Vitro</i> Metabolic Stability* (Mouse/Monkey/Human)</b> |                |
|------------------------------------------------------------------|----------------|
| Liver Lysate                                                     | 98%/96%/98%    |
| Kidney Lysate                                                    | 100%/100%/100% |
| Whole Blood                                                      | 100%/100%/100% |
| <b><i>In Vivo</i> Metabolic Stability** (Mouse)</b>              |                |
| Liver                                                            | >95%           |
| Kidney                                                           | >95%           |
| Plasma                                                           | >95%           |

\*Percentage intact RGLS4326 following 24 h incubation at 5  $\mu$ M in indicated mouse, monkey or human samples.

\*\*Percentage intact RGLS4326 at 24 h following a single subcutaneous dose at 30 mg kg<sup>-1</sup>.

**Supplementary Table 2. Preclinical Safety Profile of RGLS4326**

| <b>Genotoxicity</b>                           |                                     |
|-----------------------------------------------|-------------------------------------|
| Bacterial Mutagenicity                        | Negative <sup>&amp;</sup>           |
| <i>In Vitro</i> Clastogenicity in Human Cells | Negative <sup>&amp;&amp;</sup>      |
| <i>In Vivo</i> Clastogenicity in Mouse        | Negative <sup>&amp;&amp;&amp;</sup> |
| <b>Mitochondrial Toxicity</b>                 |                                     |
| <i>In Vitro</i> Assessment in Human Cells     | Negative <sup>\$</sup>              |
| <i>In Vivo</i> Assessment in Monkey           | Negative <sup>\$\$</sup>            |
| <b>Pro-inflammatory Liability</b>             |                                     |
| <i>Ex Vivo</i> Rat Tissue Slice Assay         | Negative <sup>#</sup>               |
| <i>In Vivo</i> Acute Mouse Study              | Negative <sup>##</sup>              |

<sup>&</sup>Tested at up to 5000 µg plate<sup>-1</sup> in *S.typhimurium* and *E.coli*.

<sup>&&</sup>Tested at up to 500 µg mL<sup>-1</sup> in human lymphocytes *in vitro*.

<sup>&&&</sup>Tested at maximum tolerated dose in CD1 mice in both micronucleus and comet assays *in vivo*.

<sup>\$</sup>Tested at up to 100 µM in human HepG2 cells under glucose- or galactose-dependent conditions.

<sup>\$\$</sup>No evidence of treatment related changes in mitochondrial morphology and cellular density as examined by transmission electron microscopy in kidney, liver and heart samples following 6 weekly SC doses at 100 mg kg<sup>-1</sup> in cynomolgus monkey.

<sup>#</sup>No significant changes in *Oasl1a* and *Ifit3* expression after 24 h or 48 h incubation at 5 µM in Sprague Dawley rat liver or kidney slice culture, respectively.

<sup>##</sup>No significant changes in spleen weight per body weight ratios, serum ALT, AST, BUN, and creatinine, and kidney or liver *Oasl2* or *Ifit1* expression 96 h following a single subcutaneous dose at 300 mg kg<sup>-1</sup> in SvJ129 mice.

**Supplementary Table 3. *List of miRNA probes***

| <b>Gene</b>       | <b>TaqMan microRNA Assay ID*<br/>(Applied Biosystems)</b> |
|-------------------|-----------------------------------------------------------|
| <i>Hsa-miR-17</i> | #002308                                                   |
| <i>Hsa-Let-7d</i> | #002283                                                   |
| <i>U6 snRNA</i>   | #001973                                                   |

\*Sequence information proprietary to manufacturer (Applied Biosystems/Thermo Fisher Scientific). Please contact manufacturer and refer to specific Assay ID.

**Supplementary Table 4. List of mRNA probes and primers**

| Gene                             | PrimeTime Std qPCR Assay ID (IDT) | Probe Sequence (5'→3')                         | Primer 1 Sequence (5'→3') | Primer 2 Sequence (5'→3') |
|----------------------------------|-----------------------------------|------------------------------------------------|---------------------------|---------------------------|
| <b>Mouse miR-17 PD-Signature</b> |                                   |                                                |                           |                           |
| <i>Cdc37l1</i>                   | Mm.PT.56a.9136085                 | 6FAM/TCTTCAGTG/ZEN/TTGTACCCTGCCCC/3IABkFQ/     | GTCCATCATTCGGTCATCATCT    | GGCTCCTTAGAATCCTTACCAC    |
| <i>Clock</i>                     | Mm.PT.58.6936121                  | 6FAM/TCCAGTCCT/ZEN/GTCGAATCTCACTAGCA/3IABkFQ/  | ACTTCCATCTGTCATGATCGC     | ACATAAAGAGACCACTGCACAG    |
| <i>D030056 L22Rik</i>            | Mm.PT.56a.11893193                | 6FAM/TGCACAGCC/ZEN/AGCCTGAAGAGTTT/3IABkFQ/     | CAGATCAAGAGGTGGCAGAG      | GGCGACAGAGTAGAAAGCG       |
| <i>E2f1</i>                      | Mm.PT.58.32742399                 | 6FAM/TCCAGCTCA/ZEN/TTGCCAAGAAGTCCA/3IABkFQ/    | GCTTACCAATCCCCACCAT       | GCGCATCTATGACATCACCA      |
| <i>Nagk</i>                      | Mm.PT.58.6224614                  | 6FAM/TCTCCCTGA/ZEN/TGTGCACCTTCTGC/3IABkFQ/     | CAGCCTTCCTGAAGATGTACC     | TATTTCCAGGTGCCAGATCG      |
| <i>P2rx4</i>                     | Mm.PT.58.33691452                 | 6FAM/CCACACGAA/ZEN/CACCCACCCAATGA/3IABkFQ/     | CTGACCACAGAGTCCGTTTC      | ATCCGCAGCCGTAAAGTG        |
| <i>Plekha3</i>                   | Mm.PT.58.21748816                 | 6FAM/CCGCCATCT/ZEN/TTATACTCCCTTGCTCC/3IABkFQ/  | CTCCATTCTTGTGTTGTCTGC     | TCCTGTCCTACTATGACTCACA    |
| <i>Rhoc</i>                      | Mm.PT.58.45919698                 | 6FAM/CTGGTATGC/ZEN/TCATCTTGCCTCAGGT/3IABkFQ/   | GCCTTCCTCAGATCGAACC       | CGTGCCCATCATCCTAGTG       |
| <i>Tgfb2</i>                     | Mm.PT.58.6358355                  | 6FAM/CCATCTGTG/ZEN/AGAAGCCGCATGAAGT/3IABkFQ/   | AACCGTCTCCAGAGTAATGTTC    | GACAACCAGAAGTCCTGCAT      |
| <i>Zfp367</i>                    | Mm.PT.58.10557388                 | 6FAM/TCATCTCCC/ZEN/AGTACTTTGCCAGCC/3IABkFQ/    | CCTTCTGAACTAGCTTGCCTTT    | CTGAAGAGAGAAGAGCCAACG     |
| <i>Polq</i>                      | Mm.PT.58.5536034                  | 6FAM/TGCCTTTCA/ZEN/AAAGTGC CCGGAAG/3IABkFQ/    | GCCAGTCACCCAAATAGTTCT     | GATAGTGCGGAGGTAGAGGT      |
| <i>Mtf1</i>                      | Mm.PT.58.10188697                 | 6FAM/CCACCAGTT/ZEN/CACCACA AAACCAAGAA/3IABkFQ/ | CTGCTCCACTTTCGATGCTT      | TGCAGTCCAGCCTAGTCAT       |
| <i>Mink1</i>                     | Mm.PT.58.8539396                  | 6FAM/TGACGTGCC/ZEN/GCCCCTTGTATAC/3IABkFQ/      | ATCTCTTCCTCCTCATCCTCT     | GTTGGCAATGGAACCTATGGA     |
| <i>Fyco1</i>                     | Mm.PT.58.12062609                 | 6FAM/CCAGTGCAA/ZEN/GGTCCTCATTCCCA/3IABkFQ/     | AAGATGAGCAAGTAGATGCCA     | TTCCAAGAGACAGAAGACACG     |
| <i>Ddhd1</i>                     | Mm.PT.58.6950944                  | 6FAM/ATCAGCTTG/ZEN/GTTCCAGTACACCGG/3IABkFQ/    | TCCCATCAATAAACCACTGTCC    | TCTACGAGGTGGATGTCACT      |

|                                  |                    |                                                       |                             |                         |
|----------------------------------|--------------------|-------------------------------------------------------|-----------------------------|-------------------------|
| <i>Wfs1</i>                      | Mm.PT.58.10459648  | 6FAM/CCTCGTCAG/ZEN/CAGTGAA<br>TCCAAGAACT/3IABkFQ/     | TCCACAAAATCGTCCAGAGC        | GTCAACGAGCAGGATGGAG     |
| <i>St6galna<br/>c6</i>           | Mm.PT.58.41491160  | 6FAM/AAGTCCCAT/ZEN/TCCTGGT<br>TGAGCACG/3IABkFQ/       | CACACAATTCCACCGCAATC        | CAGCAGTTTGACGACCTCTT    |
| <i>Pfklp</i>                     | Mm.PT.58.23785960  | 6FAM/AAGCCGTGA/ZEN/AACTCC<br>GAGGAAGG/3IABkFQ/        | GACGCTTATAGGTGTTCAGGTT      | AGTGTGTGCAAATGACCCA     |
| <i>Tbp</i>                       | Mm.PT.39a.22214839 | 6FAM/ACTTGACCT/ZEN/AAAGACC<br>ATTGCACTTCGT/3IABkFQ/   | CCAGAACTGAAAATCAACGCA<br>G  | TGTATCTACCGTGAATCTTGGC  |
| <i>Gusb</i>                      | Mm.PT.39a.22214848 | 6FAM/ACATCACCC/ZEN/AAGAAG<br>CAGCCCT/3IABkFQ/         | ACCACACCCAGCCAATAAAG        | AGCAATGGTACCGGCAG       |
| <i>Rplp0</i>                     | Mm.PT.58.43894205  | 6FAM/AGGCCCTGC/ZEN/ACTCTCG<br>CTT/3IABkFQ/            | CGCTTGTAACCCATTGATGATG      | TTATAACCCTGAAGTGCTCGAC  |
| <i>Hprt1</i>                     | Mm.PT.39a.22214828 | 6FAM/CTTGCTGGT/ZEN/GAAAAGG<br>ACCTCTCGAA/3IABkFQ/     | AACAAAGTCTGGCCTGTATCC       | CCCCAAAATGGTTAAGGTTGC   |
| <i>B2m</i>                       | Mm.PT.39a.22214835 | 6FAM/CCGGAGAAT/ZEN/GGGAAG<br>CCGAACATAC/3IABkFQ/      | GGGTGGAAGTGTGTTACGTAG       | TGGTCTTTCTGGTGCTTGTC    |
| <i>Paklip1</i>                   | Mm.PT.58.12717376  | 6FAM/ACTGACCAT/ZEN/GTCTTTT<br>ACCCTGTTCTCATG/3IABkFQ/ | TGCTGTGACAAGAACGTGAT        | TGTGATTCCCTAGAGTGCCT    |
| <b>Mouse or Rat Genes</b>        |                    |                                                       |                             |                         |
| <i>Pkd1</i>                      | Mm.PT.58.10660047  | 6FAM/AACTCAAG/ZEN/GGACAC<br>AATGGGGAC/3IABkFQ/        | GGAAGTTCGGCTCACTTCATAC      | TGGAAAGCAGGTCGGAAG      |
| <i>Pkd2</i>                      | Mm.PT.58.10481485  | 6FAM/CGAGACATG/ZEN/GTTGTGG<br>AGAGCTGG/3IABkFQ/       | ATTATGGTGAAGCCGAAGAGG       | CTGTCATGGTATTTTTGGTCTGG |
| <i>Lcn2<br/>(Ngal)</i>           | Mm.PT.58.10167155  | 6FAM/TGTTCTGAT/ZEN/CCAGTAG<br>CGACAGCC/3IABkFQ/       | CCTGTGCATATTTCCAGAGT        | CTACAATGTCACCTCCATCCTG  |
| <i>Ifit1</i>                     | Mm.PT.58.32674307  | 6FAM/ACAGCTACC/ZEN/ACCTTTA<br>CAGCAACCAT/3IABkFQ/     | TGAAGCAGATTCTCCATGACC       | GCAAGAGAGCAGAGAGTCAAG   |
| <i>Oasl2</i>                     | Mm.PT.56a.17167264 | 6FAM/CACTGCAGG/ZEN/TACCAG<br>AACTTCACCA/3IABkFQ/      | GCACCTCTTCCATATTTACGTC<br>T | GCTTACAGAGTTACAGAGACA   |
| <i>Ifit3</i>                     | Rn.PT.58.13648367  | 6FAM/TCCAGAGAC/ZEN/TCCTTGT<br>TGACCTCACT/3IABkFQ/     | TCCATATGACTTGAGATGCTTC<br>C | CATAGAAACAGATCGCCGTCA   |
| <i>Oasl1a</i>                    | Rn.PT.58.34651724  | 6FAM/TGCTTCCGA/ZEN/GATACTG<br>TCCACCCA/3IABkFQ/       | GTCTGACTTGCCCTTGAGTG        | TCAGCTATCAATGTCTGTGTG   |
| <b>Human miR-17 PD-Signature</b> |                    |                                                       |                             |                         |
| <i>BTG3</i>                      | Hs.PT.58.28207974  | 6FAM/AACTCCTG/ZEN/ACCTCGT<br>GATCCGC/3IABkFQ/         | GCTCACGCCTGTAATCCA          | ATGTGAGGTGTGCTGTGCG     |
| <i>C7ORF4<br/>3</i>              | Hs.PT.58.19749599  | 6FAM/TCTGCCACA/ZEN/CGCCCCCT<br>CA/3IABkFQ/            | CCGGGAAAAGCCAAGGT           | CTCCAAGACTTCCTTGCTGT    |

|                     |                    |                                                                |                               |                         |
|---------------------|--------------------|----------------------------------------------------------------|-------------------------------|-------------------------|
| <i>CROT</i>         | Hs.PT.58.20126844  | 6FAM/TCCATGATA/ZEN/AAATCAC<br>AATAGGAAACCAGTACACC/3IABk<br>FQ/ | GCAGTGATGGAAGAGAATCCT         | GCAGTCTCAAGCAGTTCATCT   |
| <i>ENPP5</i>        | Hs.PT.58.19757218  | 6FAM/TGACTTTCT/ZEN/GTTAGGC<br>AACCACGGT/3IABkFQ/               | CTTTCTGAAGGCAGGACCAT          | AACCAATCATAGCAGTGGCT    |
| <i>GUSB</i>         | Hs.PT.58v.27737538 | 6FAM/TGCAGGGTT/ZEN/TCACCAG<br>GATCCAC/3IABkFQ/                 | GTTTTTGATCCAGACCCAGATG        | GCCCATTATTCAGAGCGAGTA   |
| <i>HPRT1</i>        | Hs.PT.58v.45621572 | 6FAM/AGCCTAAGA/ZEN/TGAGAG<br>TTCAAGTTGAGTTTGG/3IABkFQ/         | GCGATGTCAATAGGACTCCAG         | TTGTTGTAGGATATGCCCTTGA  |
| <i>LIMK1</i>        | Hs.PT.58.4056836   | 6FAM/CCAGCCCGA/ZEN/AGTCAG<br>CCACC/3IABkFQ/                    | AGTCTTCTCGTCCACCATGA          | GAACATCATCCACCGAGACC    |
| <i>MINK1</i>        | Hs.PT.58.3502144   | 6FAM/CACCGCAAC/ZEN/ATCGCCA<br>CCTACT/3IABkFQ/                  | CCACAGAACTCCATCACCAG          | GAGGAAGAGATCAAACAGGAGA  |
| <i>NAGK</i>         | Hs.PT.58.21111037  | 6FAM/ATTGGACTC/ZEN/CCCATCC<br>TGTGCG/3IABkFQ/                  | AAACCTTCCTTCAGCAGCTC          | GCAGACACATCGTAGCAGT     |
| <i>NKIRAS<br/>1</i> | Hs.PT.58.39278922  | 6FAM/CAGCTCCTT/ZEN/TATGGAA<br>ATCATACTATTGGAATGGA/3IABk<br>FQ/ | TCGGTCTGTTTCTACTGAAGC         | GGTTTGTGGATTGTTATCTGTGG |
| <i>PLEKH<br/>A3</i> | Hs.PT.56a.19457926 | 6FAM/TCCTCTTGA/ZEN/AGACCCA<br>GATAGACCTGTTC/3IABkFQ/           | GCTTTCTTCAGGAATGGTTGC         | GCCGAAGAACCTACTCAGATAC  |
| <i>PTPN4</i>        | Hs.PT.58.22922591  | 6FAM/TGCTGACCT/ZEN/CTGTGTC<br>CCTAGACTG/3IABkFQ/               | CATGAGTGTGTTCTGCAATGTC        | CTGTGATTGTGTCTCGAGTAGC  |
| <i>RPLP0</i>        | Hs.PT.39a.22214824 | 6FAM/CCCTGTCTT/ZEN/CCCTGGG<br>CATCAC/3IABkFQ/                  | TGTCTGCTCCCACAATGAAAC         | TCGTCTTTAAACCCTGCGTG    |
| <i>TBC1D9</i>       | Hs.PT.58.19975995  | 6FAM/TCAAGCCAT/ZEN/TCCCAGT<br>GTTCAAGTGAT/3IABkFQ/             | GGAGAGTGTCTGCAAGAGAT          | GCTCCTTACCGAATCTTGTACC  |
| <i>B2M</i>          | Hs.PT.58v.18759587 | 6FAM/CCTGCCGTG/ZEN/TGAACCA<br>TGTGACT/3IABkFQ/                 | ACCTCCATGATGCTGCTTAC          | GGACTGGTCTTTCTATCTCTTGT |
| <i>TBP</i>          | Hs.PT.58v.39858774 | 6FAM/TGATCTTTG/ZEN/CAGTGAC<br>CCAGCATCA/3IABkFQ/               | CAGCAACTTCCTCAATTCCTTG        | GCTGTTTAACTTCGCTTCCG    |
| <i>TGFBR2</i>       | Hs.PT.58.2243027   | 6FAM/TTCTCCATA/ZEN/CAGCCAC<br>ACAGACTTCC/3IABkFQ/              | CTGTCTCTAGTGTTATGTTCTCG<br>TC | TGACAACCAGAAATCCTGCAT   |

**6FAM**, 5'-6-FAM<sup>TM</sup> 520nm Fluorescein; **ZEN**, Internal ZEN<sup>TM</sup> quencher; **3IABkFQ**, 3'-Iowa Black® FQ quencher.
